# Supplementary material for: Uptake Routes and Biodistribution of Polystyrene Nanoplastics on Zebrafish Larvae and Toxic Effects on Development
Source: MDPI journal article supplement (doi:10.3390/fishes8030168), 2023-03-20
Supplement: s1 [file s1]

## Supplementary materials

**Table S1.** In FLAP the pharmacophores for a ligand are defined in terms of the types of atoms, which can interact with the receptor. The types of atoms are classified based on the interactions:

|                                                         |
|---------------------------------------------------------|
| Hydrogen bond donors (N1)                               |
| Hydrogen bond acceptors (O)                             |
| Positively charged centers (N+)                         |
| Negatively charged centers (O-)                         |
| Hydrophobic Centers (DRY)                               |
| Hydrogen bond donor-acceptor centers (OH, O1, N1 or N2) |
| Shape (H)                                               |

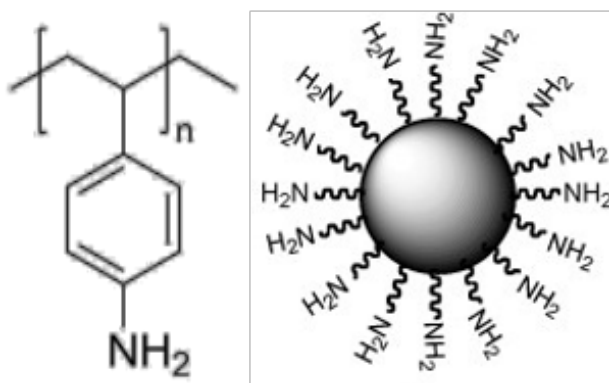

**Figure S1.** The amino-modified polystyrene nanoparticle used for the screening (Chemdraw software).

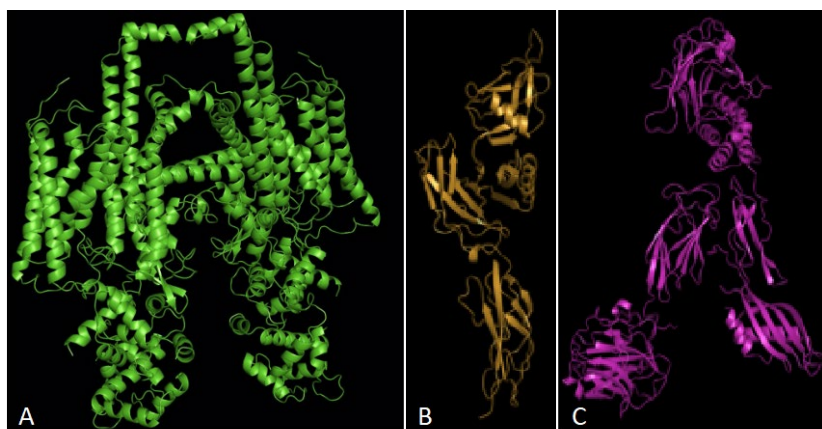

**Figure S2.** Crystallized structure of receptors. A) Receptor for retinol uptake stra6 (STRA6); B) Adhesion G protein-coupled receptor G6 (Adgrg6; also named GPR126); C) Contactin 4 (CNTN4) and amyloid beta precursor like protein 2 (APLP2) complex.

**Table S2.** Summarized table of all tested parameters expressed as mean  $\pm$  standard deviation. \*\* indicates statistically significant differences ( $P < 0.05$ ).

| Parameters             | Time of exposure | CTRL              | 50 nm 10 mg/L      | 100 nm 10 mg/L      | 50 nm 20 mg/L       | 100 nm 20 mg/L     |
|------------------------|------------------|-------------------|--------------------|---------------------|---------------------|--------------------|
| Mortality (%)          | 24 hpf           | 1 $\pm$ 0.001     | 1 $\pm$ 0.001      | 2.59 $\pm$ 0.01     | 1.54 $\pm$ 0.01     | 2.05 $\pm$ 0.01    |
|                        | 48 hpf           | 1 $\pm$ 0.001     | 1 $\pm$ 0.001      | 3.1 $\pm$ 0.001     | 1.54 $\pm$ 0.01     | 2.05 $\pm$ 0.01    |
|                        | 72 hpf           | 1 $\pm$ 0.001     | 1 $\pm$ 0.001      | 3.1 $\pm$ 0.001     | 1.54 $\pm$ 0.01     | 2.05 $\pm$ 0.01    |
|                        | 96 hpf           | 1 $\pm$ 0.001     | 5.19 $\pm$ 0.04    | 4.65 $\pm$ 0.02     | 2.08 $\pm$ 0.001    | 2.55 $\pm$ 0.02    |
| Hatching (%)           | 24 hpf           | -                 | -                  | -                   | -                   | -                  |
|                        | 48 hpf           | -                 | -                  | -                   | -                   | -                  |
|                        | 72 hpf           | 46 $\pm$ 0.02     | 2.6 $\pm$ 0.03     | -                   | -                   | -                  |
|                        | 96 hpf           | 82 $\pm$ 0.26     | 11 $\pm$ 0.06**    | 30 $\pm$ 0.10**     | 0**                 | 0**                |
| Malformation (%)       | 24 hpf           | -                 | -                  | -                   | -                   | -                  |
|                        | 48 hpf           | -                 | 1 $\pm$ 0.001      | -                   | -                   | -                  |
|                        | 72 hpf           | -                 | 1 $\pm$ 0.001      | -                   | -                   | -                  |
|                        | 96 hpf           | -                 | 1 $\pm$ 0.001      | 2.8 $\pm$ 0.001     | 7.1 $\pm$ 0.001*    | 1 $\pm$ 0.001      |
| ROS (%)                | 96 hpf           | 3 $\pm$ 0.012     | 3 $\pm$ 0.015      | 4 $\pm$ 0.01        | 93 $\pm$ 0.04**     | 97 $\pm$ 0.04**    |
| Apoptosis (%)          | 96 hpf           | 1 $\pm$ 0.015     | 54 $\pm$ 0.04**    | 74 $\pm$ 0.015**    | 75 $\pm$ 0.04**     | 88 $\pm$ 0.025**   |
| Fluorescence Intensity | 96 h             |                   |                    |                     |                     |                    |
| Eye                    |                  | 15.06 $\pm$ 0.007 | 28.01 $\pm$ 0.08** | 25.98 $\pm$ 0.005** | 55.73 $\pm$ 0.009** | 64.36 $\pm$ 0.04** |
| Yolk sac               |                  | 15.05 $\pm$ 0.03  | 26.58 $\pm$ 0.04** | 20.06 $\pm$ 0.02**  | 38.29 $\pm$ 0.02**  | 69.98 $\pm$ 0.04** |

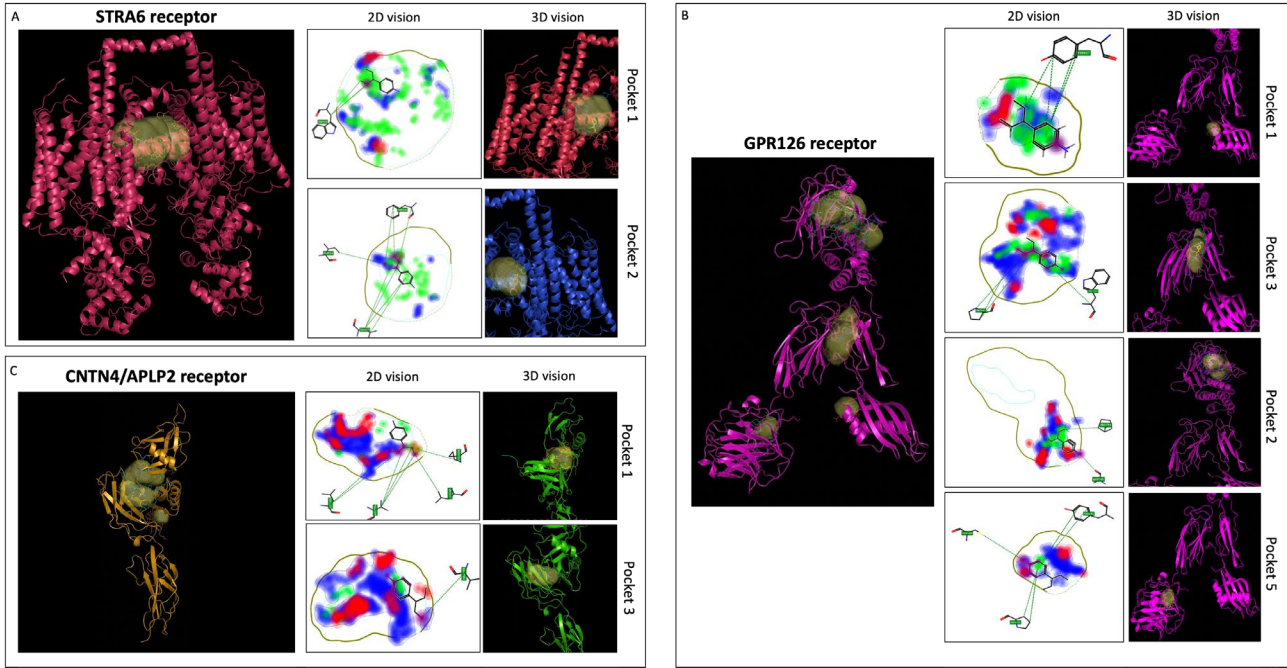

**Figure S3.** Crystallized structure of *D. rerio* receptors with visible Pockets. A) Receptor for retinol uptake stra6 (STRA6) with 2D and 3D visions of Pockets 1 and 2; B) Adhesion G protein-coupled receptor G6 (Adgrg6; also

named GPR126) with 2D and 3D visions of Pockets 1, 3, 2 and 5; C) Contactin 4 (CNTN4) and amyloid beta precursor like protein 2 (APLP2) complex with 2D and 3D visions of Pockets 1 and 3.

**Table S3.** Affinity of nPS-NPs toward the pockets of STRA6, GPR126 and CNTN4/APLP2 receptors based on potential bonding types (summarized through Glob-Sum) and pocket size.

| Receptor    | Candidate | Distance | Glob-Sum | Glob-Prod | H     | N1    | DRY   | O |
|-------------|-----------|----------|----------|-----------|-------|-------|-------|---|
| STRA6       | Pocket 1  | 13.069   | 1.408    | 0.527     | 0,850 | 0,072 | 0,490 | 0 |
|             | Pocket 2  | 13.609   | 1.704    | 0         | 0,988 | 0     | 0,731 | 0 |
| GPR126      | Pocket 1  | 12.223   | 1.831    | 0.515     | 0.938 | 0.032 | 0.897 | 0 |
|             | Pocket 2  | 13.603   | 1.393    | 0.406     | 0.845 | 0.014 | 0.534 | 0 |
|             | Pocket 3  | 11.824   | 1.723    | 0.584     | 0.978 | 0.107 | 0.799 | 0 |
|             | Pocket 5  | 13.994   | 1.231    | 0.371     | 0.817 | 0.023 | 0.402 | 0 |
| CNTN4/APLP2 | Pocket 1  | 12.893   | 1.364    | 0.522     | 0.950 | 0.078 | 0.518 | 0 |
|             | Pocket 3  | 13.583   | 1.277    | 0.447     | 0.894 | 0.034 | 0.424 | 0 |
